# Supplementary material for: hsa_circ0021347 as a Potential Target Regulated by B7-H3 in Modulating the Malignant Characteristics of Osteosarcoma
Source: Hindawi journal article supplement (doi:10.1155/2019/9301989), 2019-12-18
Supplement: f1 [file 9301989.f1.pdf]

Supple figure 1

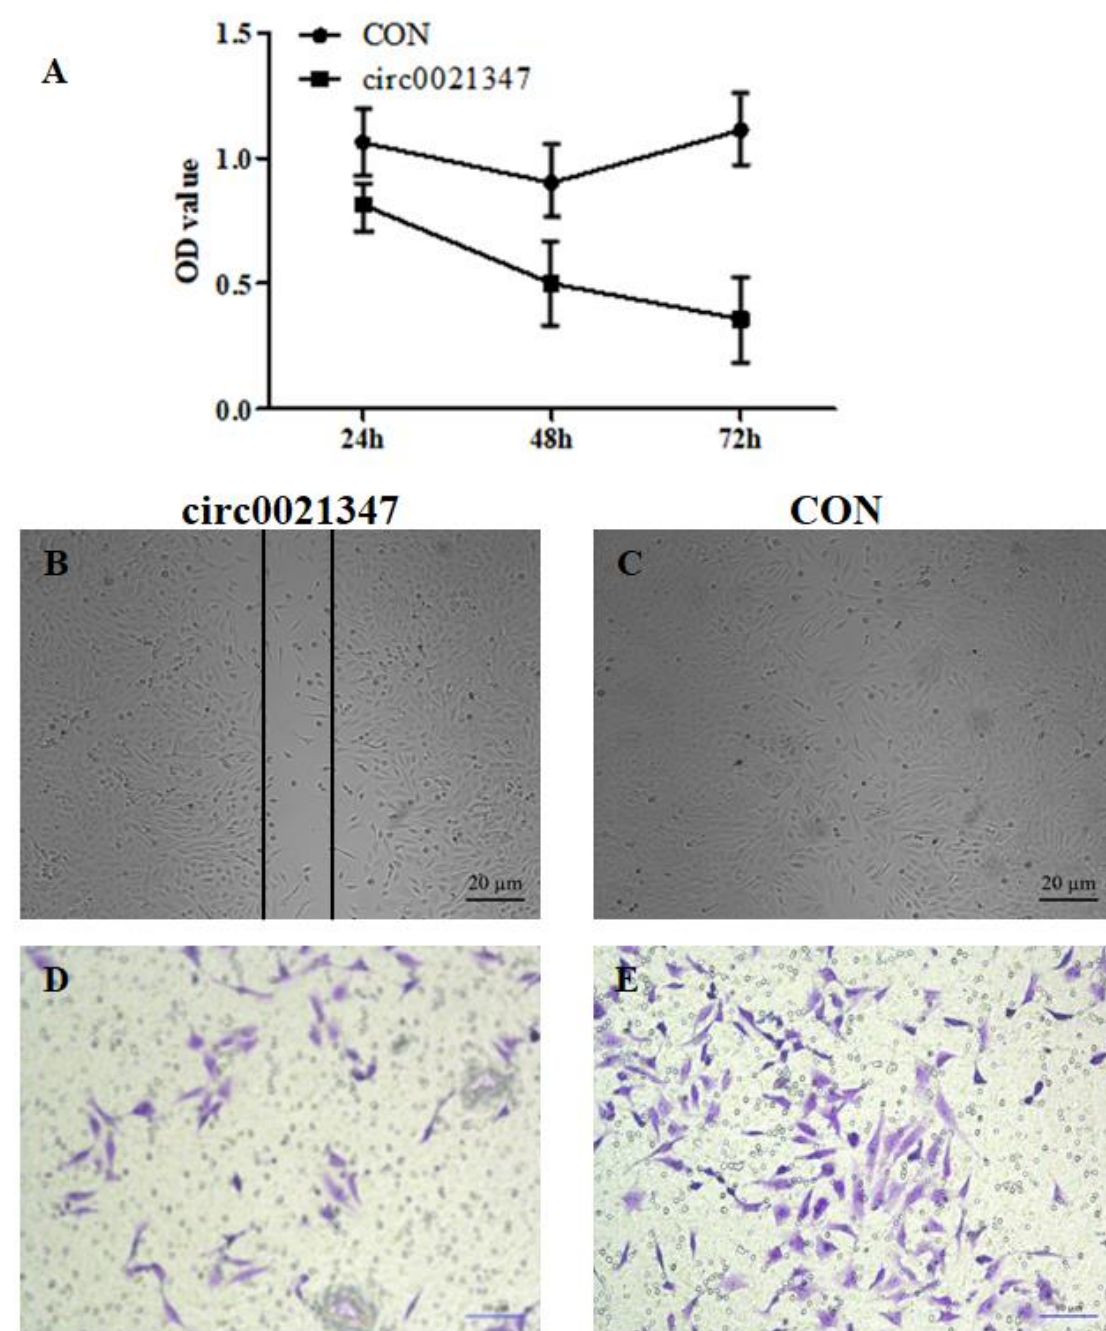

**Supple table 1. Clinical characteristics of the study patients' cohort of OS patients**

| Variable               | OS patients |
|------------------------|-------------|
| Cases                  | 35          |
| Age                    |             |
| $\leq 10$              | 20          |
| $> 10$                 | 15          |
| Gender                 |             |
| Male                   | 20          |
| Female                 | 15          |
| Site                   |             |
| Femur                  | 17          |
| Tibia                  | 13          |
| Others                 | 5           |
| Ennecking stage        |             |
| I-II stage             | 12          |
| III-IV stage           | 23          |
| Differentiation status |             |
| High                   | 20          |
| Low                    | 15          |
| Lung metastasis        |             |
| Yes                    | 10          |
| No                     | 25          |
